# Supplementary material
Source: PubMed Central journal article supplement (PMC2818902)
Supplement: 0911476107_pnas.200911476SI.pdf [file 0911476107_pnas.200911476SI.pdf]

# Supporting Information

Hosokawa et al. 10.1073/pnas.0911476107

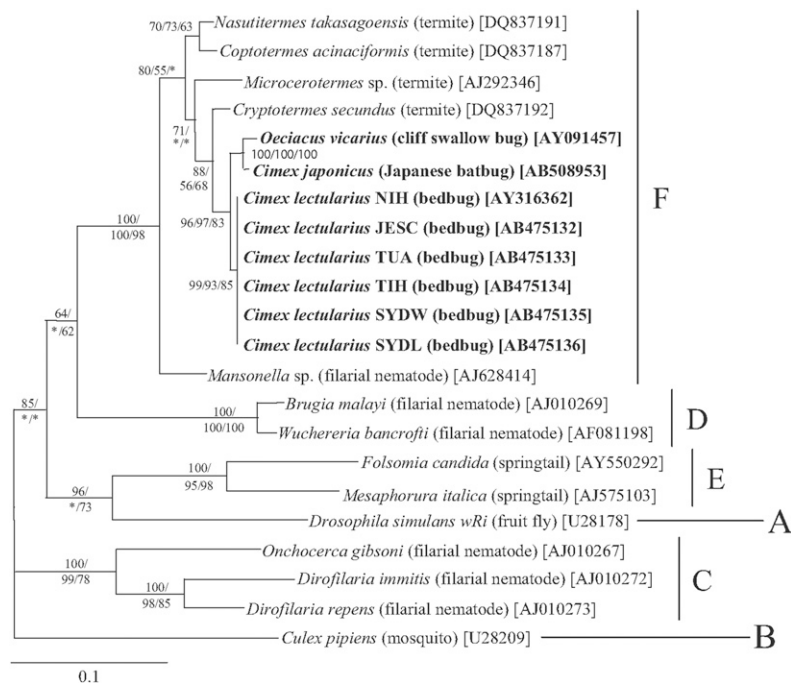

**Fig. S1.** Phylogenetic placement of *Wolbachia* from *C. lectularius* and allied bugs on the basis of 722 aligned nucleotide sites of *ftsZ* gene sequences. A Bayesian (BA) phylogeny is shown. Host insect names in *italics*, accession numbers in brackets, and *Wolbachia* supergroups A–F on the right side are shown. Posterior probabilities for BA analysis and bootstrap probabilities for maximum parsimony (MP) and maximum likelihood (ML) analyses greater than 50% are indicated at the nodes in the order of BA/MP/ML.

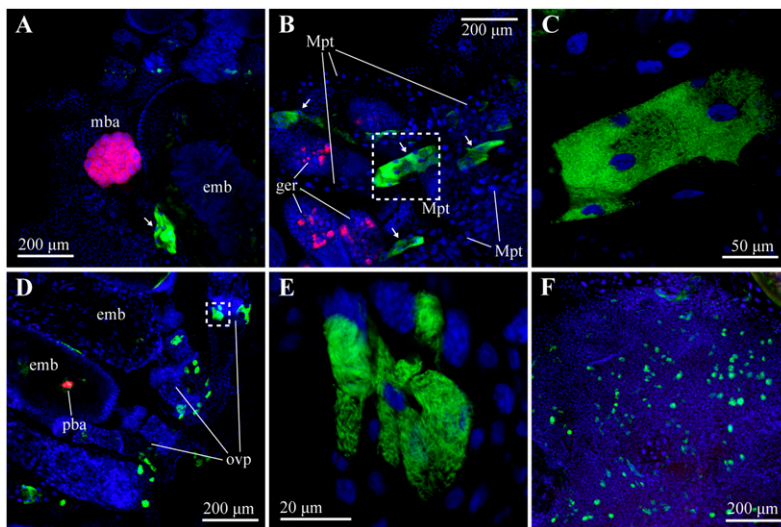

**Fig. S2.** Localization of  $\gamma$ -proteobacterial symbiont in *C. lectularius*. (A) A Malpighian tubule infected with  $\gamma$ -proteobacterial symbiont (arrow) nearby a maternal bacteriome and an embryo. (B) Infected regions (arrows) and uninfected regions (Mpt) of Malpighian tubules nearby ovarioles. (C) An enlarged image of the infected Malpighian tubule. (D) A number of infected cells in ovariole pedicels. (E) An enlarged image of infected cells in the ovariole pedicel. (F) Infected cells scattered in mesospermalage, a hemocyte-containing female organ into which sperm are introduced via traumatic insemination. Green, red, and blue signals indicate  $\gamma$ -proteobacteria, *Wolbachia* and insect nuclei, respectively. Abbreviations: emb, embryo; ger, germarium; mba, maternal bacteriome; Mpt, Malpighian tubule; pba, embryonic primordial bacteriome; ovp, ovariole pedicel.

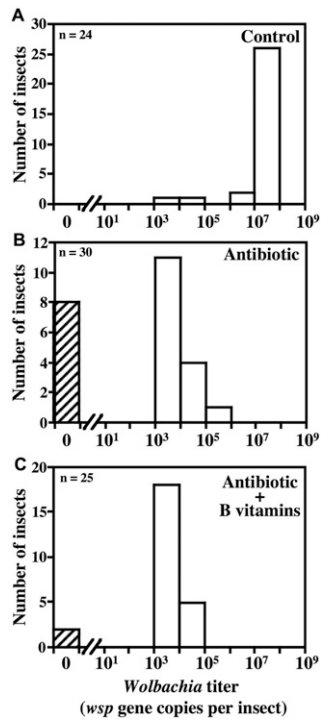

**Fig. 53.** *Wolbachia* infection titers in adult insects of *C. lectularius* after 8 weeks of experimental treatments. (A) Control insects. (B) Antibiotic-treated insects fed on a rifampicin-containing blood meal. (C) Antibiotic-treated and B vitamin-supplemented insects fed on a rifampicin- and B vitamin-containing blood meal.

**Table S1. The insects used in this study and their infection with the *Wolbachia* symbiont and the  $\gamma$ -proteobacterial symbiont**

|                                               | Insect origin and description                                                                                                                                                                             | <i>Wolbachia</i> infection rate* | $\gamma$ -proteobacterial infection rate* | <i>Wolbachia</i> 16S rRNA gene | <i>Wolbachia</i> ftsZ gene | $\gamma$ -proteobacterial 16S rRNA gene | Insect elongation factor 1 $\alpha$ gene |
|-----------------------------------------------|-----------------------------------------------------------------------------------------------------------------------------------------------------------------------------------------------------------|----------------------------------|-------------------------------------------|--------------------------------|----------------------------|-----------------------------------------|------------------------------------------|
| The common bedbug<br><i>Cimex lectularius</i> | JESC: A laboratory strain of unknown origin maintained on mice at the Japan Environmental Sanitation Center for over 10 years. Provided by A. Muto. <sup>†</sup>                                          | 100% <sup>†</sup> (46/46)        | 0% <sup>†</sup> (0/46)                    | AB475122                       | AB475132                   | —                                       | AB475141                                 |
|                                               | TUA: Insects collected in 2005 and 2006 from a colony at a quail coop in the Tokyo University of Agriculture, Japan. Provided by T. Ishikawa. <sup>‡</sup>                                                | 100% <sup>†</sup> (48/48)        | 96% <sup>†</sup> (46/48)                  | AB475123                       | AB475133                   | AB475137                                | AB475142                                 |
|                                               | TIH: A laboratory strain maintained on mice at the Toyama Institute of Health for 7 years since collected at Toyama, Japan. Provided by T. Yamauchi. <sup>‡</sup>                                         | 100% <sup>†</sup> (3/3)          | 67% <sup>‡</sup> (2/3)                    | AB475124                       | AB475134                   | AB475138                                | —                                        |
|                                               | SYDW: Insects collected in 2007 at Sydney, Australia. Provided by S.L. Doggett. <sup>§</sup>                                                                                                              | 100% <sup>†</sup> (4/4)          | 100% <sup>‡</sup> (4/4)                   | AB475125                       | AB475135                   | AB475139                                | —                                        |
|                                               | SYDL: A laboratory strain maintained on rats at the Institute of Clinical Pathology and Medical Research (ICPMR) for 4 years since collected at Sydney, Australia. Provided by S.L. Doggett. <sup>§</sup> | 100% <sup>†</sup> (4/4)          | 100% <sup>‡</sup> (4/4)                   | AB475126                       | AB475136                   | AB475140                                | —                                        |
|                                               | Total                                                                                                                                                                                                     | 100% (105/105)                   | 53% (56/105)                              |                                |                            |                                         |                                          |
| The Japanese batbug<br><i>Cimex japonicus</i> | KTCH: Insects collected in 2008 from a colony of the bat <i>Vespertilio sinensis</i> at Kutchan, Hokkaido, Japan. Provided by D. Fukui. <sup>¶</sup>                                                      | 100% <sup>§</sup> (5/5)          | 0% <sup>§</sup> (0/5)                     | AB508951                       | AB508953                   | —                                       | —                                        |

\*Infection rates estimated by diagnostic PCR.

<sup>†</sup>First-instar nymphs were inspected.

<sup>‡</sup>Adult insects were inspected.

<sup>§</sup>Developmental stages were uncertain.

<sup>¶</sup>Affiliations: A. Muto, Japan Environmental Sanitation Center, Kawasaki, Japan; T. Ishikawa, Tokyo University of Agriculture, Setagaya, Japan; T. Yamauchi, Toyama Institute of Health, Imizu, Japan; S. L. Doggett, Institute of Clinical Pathology and Medical Research, Westmead, Australia; D. Fukui, Forestry and Forest Products Research Institute, Sapporo, Japan.

**Table S2. Summary of cloning and genotyping of 16S rRNA gene clones from adult insects of *C. lectularius***

| Strain | Sex and ID | Tissue     | Number of genotyped clones | 16S rRNA genotypes* |                           |
|--------|------------|------------|----------------------------|---------------------|---------------------------|
|        |            |            |                            | <i>Wolbachia</i>    | $\gamma$ -proteobacterium |
| TUA    | Male 1     | Bacteriome | 12                         | 11                  | 1                         |
| TUA    | Male 2     | Bacteriome | 15                         | 15                  | 0                         |
| TUA    | Female 1   | Bacteriome | 15                         | 15                  | 0                         |
| TIH    | Male 1     | Bacteriome | 5                          | 5                   | 0                         |
| TIH    | Male 2     | Bacteriome | 6                          | 6                   | 0                         |
| TIH    | Female 1   | Bacteriome | 8                          | 8                   | 0                         |
| JESC   | Male 1     | Bacteriome | 16                         | 16                  | 0                         |
| JESC   | Male 2     | Bacteriome | 11                         | 11                  | 0                         |
| JESC   | Male 3     | Bacteriome | 14                         | 14                  | 0                         |
| JESC   | Female 1   | Bacteriome | 10                         | 10                  | 0                         |
| JESC   | Female 2   | Bacteriome | 10                         | 10                  | 0                         |
| SYDW   | Male 1     | Abdomen    | 8                          | 3                   | 5                         |
| SYDW   | Male 2     | Abdomen    | 7                          | 3                   | 4                         |
| SYDW   | Female 1   | Abdomen    | 8                          | 3                   | 5                         |
| SYDW   | Female 2   | Abdomen    | 7                          | 1                   | 6                         |
| SYDL   | Male 1     | Abdomen    | 8                          | 3                   | 5                         |
| SYDL   | Male 2     | Abdomen    | 8                          | 0                   | 8                         |
| SYDL   | Female 1   | Abdomen    | 6                          | 0                   | 6                         |
| SYDL   | Female 2   | Abdomen    | 6                          | 3                   | 3                         |
|        |            | Total      | 180                        | 137                 | 43                        |

\*Sequencing data and restriction fragment length polymorphism data were combined.

**Table S3. List of B vitamins supplemented to the blood meal for *Wolbachia*-eliminated insects**

| Compounds*       | Final concentration* |
|------------------|----------------------|
| Thiamine         | 100 $\mu$ g/mL       |
| Riboflavin       | 20 $\mu$ g/mL        |
| Nicotinic acid   | 100 $\mu$ g/mL       |
| Pantothenic acid | 100 $\mu$ g/mL       |
| Pyridoxine       | 100 $\mu$ g/mL       |
| D-biotin         | 1 $\mu$ g/mL         |
| Folic acid       | 30 $\mu$ g/mL        |
| Cobalamin        | 1 $\mu$ g/mL         |
| Choline chloride | 185 $\mu$ g/mL       |
| Meso-inositol    | 118 $\mu$ g/mL       |

\*Prescription according to a previous study on the kissing bug *Rhodnius prolixus* (1)

1. Lake P, Friend WG (1968) The use of artificial diets to determine some of the effects of *Nocardia rhodonii* on the development of *Rhodnius prolixus*. *J Insect Physiol* 14:543–562.
